# Supplementary material
Source: Springer Nature journal article supplement (https://www.springermedizin.de/resource/supplementary/13054_2011_9918_MOESM1_ESM.pdf/9707180)
Supplement: MOESM1 [file 9707180]

AKI

207 patients enrolled

WRF

Outpatient baseline creatinine values available in 189 patients

Creatinine at presentation considered baseline value

Lowest in-hospital creatinine considered steady state in 18 patients

60 patients experienced early AKI

50 patients experienced early WRF

Pre-admission baseline creatinine available in all 10 patients

AKI but no WRF in 10 patients

Peak creatinine at presentation in 4 patients

Peak creatinine after presentation in 6 patients
